# Supplementary material for: Copper Exposure Affects Anti-Predatory Behaviour and Acetylcholinesterase Levels in Culex pipiens (Diptera, Culicidae)
Source: MDPI journal article supplement (doi:10.3390/insects13121151), 2022-12-14
Supplement: s1 [file s1]

### Supplementary information

**Figure S1.** Linear regression between distance and velocity, and length of *Culex pipiens* larvae for the first (left column) and second (right column) generation after seven days of copper treatment. The Pearson correlation coefficient and significance are indicated in the top left corner of each plot. Distance and velocity were squared- root transformed.

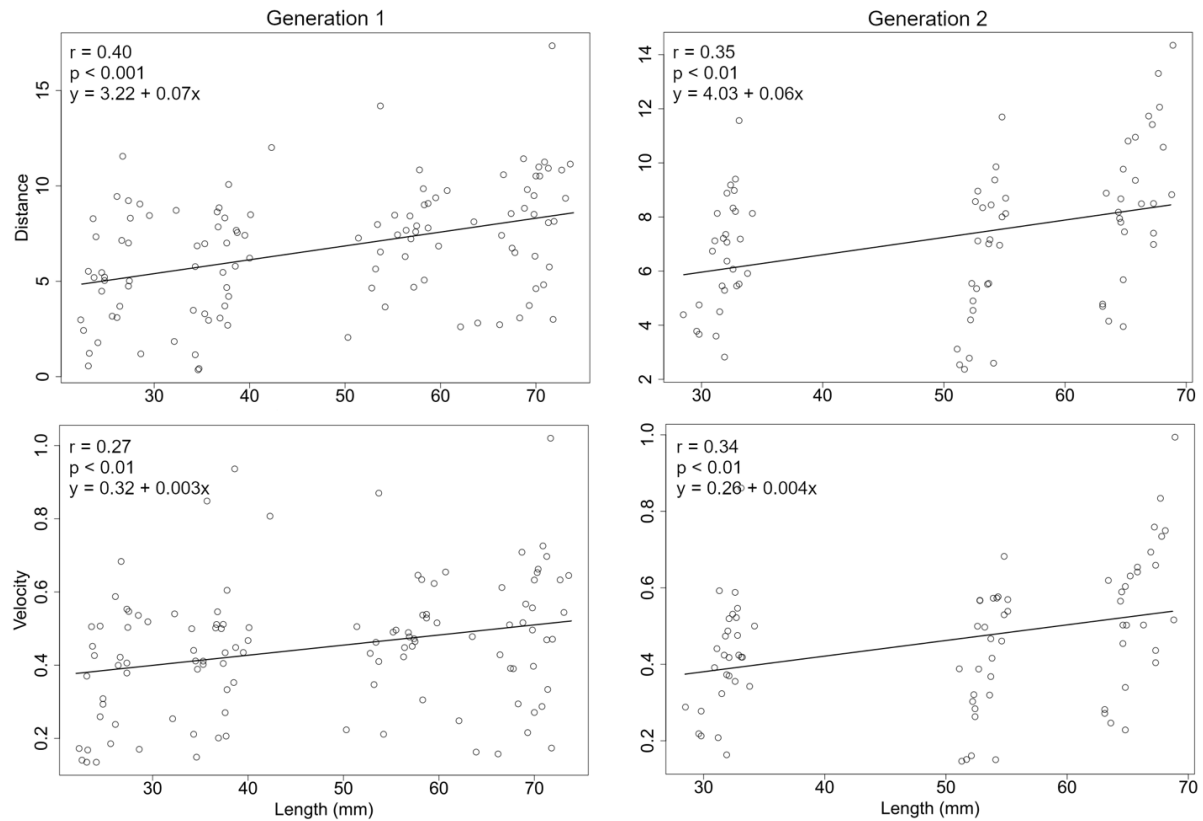

**Table S1.** Least square mean values for distance, velocity and acetylcholine concentrations across two successive generations of *Culex pipiens* larvae for each copper concentration and predator treatment after seven days of copper treatment. / means no data were available.

| Generation 1                                       | Copper concentration ( $\mu\text{g L}^{-1}$ ) |                  |                  |                  | Predator         |                  |
|----------------------------------------------------|-----------------------------------------------|------------------|------------------|------------------|------------------|------------------|
|                                                    | 0                                             | 125              | 250              | 500              | Presence         | Absence          |
| <b>Distance (cm)</b>                               | 77.00 $\pm$ 7.91                              | 60.3 $\pm$ 8.34  | 41.20 $\pm$ 7.91 | 37.60 $\pm$ 8.34 | 51.70 $\pm$ 6.06 | 56.90 $\pm$ 6.01 |
| <b>Velocity (cm/s)</b>                             | 0.27 $\pm$ 0.03                               | 0.247 $\pm$ 0.03 | 0.23 $\pm$ 0.03  | 0.163 $\pm$ 0.03 | 0.200 $\pm$ 0.02 | 0.26 $\pm$ 0.02  |
| <b>Acetylcholine (<math>\mu\text{g/mg}</math>)</b> | 9.37 $\pm$ 1.20                               | 10.39 $\pm$ 1.20 | /                | 10.4 $\pm$ 1.2   | /                | /                |
| Generation 2                                       |                                               |                  |                  |                  |                  |                  |
|                                                    | 0                                             | 125              | 250              | 500              | Presence         | Absence          |
| <b>Distance (cm)</b>                               | 83.20 $\pm$ 7.38                              | 47.70 $\pm$ 7.38 | 47.60 $\pm$ 7.38 | /                | 62.00 $\pm$ 6.46 | 56.20 $\pm$ 6.38 |
| <b>Velocity (cm/s)</b>                             | 0.34 $\pm$ 0.03                               | 0.19 $\pm$ 0.03  | 0.19 $\pm$ 0.03  | /                | 0.24 $\pm$ 0.03  | 0.24 $\pm$ 0.03  |
| <b>Acetylcholine (<math>\mu\text{g/mg}</math>)</b> | 12.80 $\pm$ 1.61                              | 15.10 $\pm$ 1.61 | /                | 5.49 $\pm$ 1.61  | /                | /                |

**Table S2.** pairwise comparisons as post-hoc tests (t-test) of the first generation of *Culex pipiens* larvae after seven days of copper exposure.

|                         | <b>Generation 1</b>                    |                 |           |           |                |                |
|-------------------------|----------------------------------------|-----------------|-----------|-----------|----------------|----------------|
| <b>Distance</b>         | <b>contrast - Copper concentration</b> | <b>estimate</b> | <b>SE</b> | <b>df</b> | <b>t.ratio</b> | <b>p.value</b> |
|                         | Control - High                         | 2.69            | 0.78      | 111       | 3.42           | <b>0.00</b>    |
|                         | Control - Low                          | 0.76            | 0.77      | 111       | 0.98           | 0.75           |
|                         | Control - Medium                       | 2.40            | 0.76      | 111       | 3.14           | 0.01           |
|                         | High - Low                             | -1.92           | 0.80      | 111       | -2.41          | 0.08           |
|                         | High - Medium                          | -0.28           | 0.78      | 111       | -0.36          | 0.98           |
|                         | Low - Medium                           | 1.64            | 0.77      | 111       | 2.10           | 0.15           |
|                         |                                        |                 |           |           |                |                |
| <b>Velocity</b>         | <b>contrast - Copper concentration</b> | <b>estimate</b> | <b>SE</b> | <b>df</b> | <b>t.ratio</b> | <b>p.value</b> |
|                         | Control - High                         | 0.11            | 0.04      | 111       | 2.55           | 0.05           |
|                         | Control - Low                          | 0.00            | 0.04      | 111       | 0.20           | 0.99           |
|                         | Control - Medium                       | 0.03            | 0.04      | 111       | 0.81           | 0.84           |
|                         | High - Low                             | -0.10           | 0.04      | 111       | -2.30          | 0.10           |
|                         | High - Medium                          | -0.08           | 0.04      | 111       | -1.75          | 0.29           |
|                         | Low - Medium                           | 0.02            | 0.04      | 111       | 0.59           | 0.93           |
|                         |                                        |                 |           |           |                |                |
| <b>Ache</b>             | <b>contrast - Copper concentration</b> | <b>estimate</b> | <b>SE</b> | <b>df</b> | <b>t.ratio</b> | <b>p.value</b> |
|                         | Control - High                         | 4.12            | 1.70      | 6         | 2.42           | 0.11           |
|                         | Control - Low                          | -1.02           | 1.70      | 6         | -0.59          | 0.82           |
|                         | High - Low                             | -5.14           | 1.70      | 6         | -3.02          | 0.05           |
|                         |                                        |                 |           |           |                |                |
| <b>N larvae eaten</b>   | <b>contrast - Copper concentration</b> | <b>estimate</b> | <b>SE</b> | <b>df</b> | <b>t.ratio</b> | <b>p.value</b> |
|                         | Control - High                         | 0.80            | 1.33      | 36        | 0.60           | 0.93           |
|                         | Control - Low                          | 0.30            | 1.33      | 36        | 0.22           | 0.99           |
|                         | Control - Medium                       | 1.10            | 1.33      | 36        | 0.83           | 0.83           |
|                         | High - Low                             | -0.50           | 1.33      | 36        | -0.37          | 0.98           |
|                         | High - Medium                          | 0.30            | 1.33      | 36        | 0.22           | 0.99           |
|                         | Low - Medium                           | 0.80            | 1.33      | 36        | 0.60           | 0.93           |
|                         |                                        |                 |           |           |                |                |
| <b>Length of larvae</b> | <b>contrast - Copper concentration</b> | <b>estimate</b> | <b>SE</b> | <b>df</b> | <b>t.ratio</b> | <b>p.value</b> |
|                         | Control - High                         | 3.30            | 0.04      | 111       | 67.37          | <.0001         |
|                         | Control - Low                          | 0.82            | 0.04      | 111       | 16.90          | <.0001         |
|                         | Control - Medium                       | 2.29            | 0.04      | 111       | 48.00          | <.0001         |
|                         | High - Low                             | -2.48           | 0.04      | 111       | -49.78         | <.0001         |
|                         | High - Medium                          | -1.01           | 0.04      | 111       | -20.64         | <.0001         |
|                         | Low - Medium                           | 1.47            | 0.04      | 111       | 30.26          | <.0001         |

p-value = significant. (Control= 0  $\mu\text{g L}^{-1}$  , Low= 125  $\mu\text{g L}^{-1}$  , Medium= 250  $\mu\text{g L}^{-1}$  , High =500  $\mu\text{g L}^{-1}$ )

**Table S3.** pairwise comparisons as post-hoc tests (t-test) of the second generation *Culex pipiens* after seven days of copper exposure.

| Generation 2     |                                 |          |      |    |         |             |
|------------------|---------------------------------|----------|------|----|---------|-------------|
| Distance         | contrast - Copper concentration | estimate | SE   | df | t.ratio | p.value     |
|                  | Control - Low                   | 2.28     | 0.68 | 78 | 3.35    | <b>0.00</b> |
|                  | Control - Medium                | 2.13     | 0.67 | 78 | 3.21    | <b>0.01</b> |
|                  | Low - Medium                    | -0.15    | 0.67 | 78 | -0.23   | 0.97        |
|                  |                                 |          |      |    |         |             |
| Velocity         | contrast - Copper concentration | estimate | SE   | df | t.ratio | p.value     |
|                  | Control - Low                   | 0.63     | 0.23 | 78 | 2.82    | <b>0.02</b> |
|                  | Control - Medium                | 0.55     | 0.22 | 78 | 2.49    | <b>0.04</b> |
|                  | Low - Medium                    | -0.09    | 0.22 | 78 | -0.40   | 0.91        |
|                  |                                 |          |      |    |         |             |
| Ache             | contrast - Copper concentration | estimate | SE   | df | t.ratio | p.value     |
|                  | Control - High                  | 7.35     | 2.28 | 6  | 3.23    | <b>0.04</b> |
|                  | Control - Low                   | -2.27    | 2.28 | 6  | -0.99   | 0.61        |
|                  | High - Low                      | -9.62    | 2.28 | 6  | -4.22   | <b>0.01</b> |
|                  |                                 |          |      |    |         |             |
| N larvae eaten   | contrast - Copper concentration | estimate | SE   | df | t.ratio | p.value     |
|                  | Control - High                  | -1.4     | 1.09 | 36 | -1.28   | 0.58        |
|                  | Control - Low                   | -0.1     | 1.09 | 36 | -0.09   | 0.99        |
|                  | Control - Medium                | -1       | 1.09 | 36 | -0.92   | 0.79        |
|                  | High - Low                      | 1.3      | 1.09 | 36 | 1.19    | 0.64        |
|                  | High - Medium                   | 0.4      | 1.09 | 36 | 0.37    | 0.98        |
|                  | Low - Medium                    | -0.9     | 1.09 | 36 | -0.82   | 0.84        |
|                  |                                 |          |      |    |         |             |
| Length of larvae | contrast - Copper concentration | estimate | SE   | df | t.ratio | p.value     |
|                  | Control - Low                   | 12.50    | 0.39 | 78 | 31.72   | <.0001      |
|                  | Control - Medium                | 33.90    | 0.39 | 78 | 88.13   | <.0001      |
|                  | Low - Medium                    | 21.40    | 0.39 | 78 | 55.56   | <.0001      |

**Table S4.** Effect of copper concentrations, duration of predation by immature Libellulidae dragonflies, and their interaction, on the number of *Culex pipiens* larvae eaten after seven days of copper treatment. Two generations were exposed to several concentrations of copper sulphate or were unexposed. Effect of the random factor is not shown. p-values and Wald Chi-squared statistic (in parentheses) for each variable. Significance is indicated by \*\*\* p < 0.001.

|                                 |    | Generation 1               | Generation 2               |
|---------------------------------|----|----------------------------|----------------------------|
|                                 |    | N larvae eaten             | N larvae eaten             |
| Variables                       | Df | <i>p</i>                   | <i>p</i>                   |
| Duration of predation           | 1  | < <b>0.001 (34.60) ***</b> | < <b>0.001 (32.00) ***</b> |
| Copper concentration            | 3  | 0.662 (1.59)               | 0.431 (2.75)               |
| Duration × copper concentration | 3  | 0.556 (2.08)               | 0.759 (1.18)               |
